# Supplementary material for: Extracellular Vesicle miR-200c Enhances Gefitinib Sensitivity in Heterogeneous EGFR-Mutant NSCLC
Source: MDPI journal article supplement (doi:10.3390/biomedicines9030243), 2021-02-28
Supplement: s1 [file s1]

This document certifies that the manuscript

**Extracellular vesicle miR200c enhances gefitinib sensitivity in heterogeneous EGFR-mutant NSCLC**

prepared by the authors

**Chien-Chung Lin, Chin-You Wu, Joseph T. Tseng, Chun-Hua Hung, Shang-Yin Wu, Yu-Ting Huang, Wei-Yuan Chang, Po-Lan Su, Wu-Chou Su**

was edited for proper English language, grammar, punctuation, spelling, and overall style by one or more of the highly qualified native English speaking editors at AJE.

This certificate was issued on **November 14, 2019** and may be verified on the [AJE website](#) using the verification code **A9BE-24AD-EF24-D8EE-5872**.

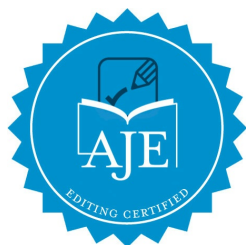

Neither the research content nor the authors' intentions were altered in any way during the editing process. Documents receiving this certification should be English-ready for publication; however, the author has the ability to accept or reject our suggestions and changes. To verify the final AJE edited version, please visit our verification page at [aje.com/certificate](#). If you have any questions or concerns about this edited document, please contact AJE at [support@aje.com](mailto:support@aje.com).
